# Supplementary material for: High-conversion-efficiency organic dye-sensitized solar cells: molecular engineering on D–A–π-A featured organic indoline dyes
Source: Royal Society of Chemistry journal article supplement (doi:10.1039/c2ee22108j), 2012-01-01
Supplement: c2ee22108j.pdf [file c2ee22108j.pdf]

*Electronic Supplementary Information*

## **High-Conversion-Efficiency Organic Dye-Sensitized Solar Cells: Molecular Engineering on D-A- $\pi$ -A Featured Organic Indoline Dyes**

**Yongzhen Wu,<sup>a</sup> Magdalena Marszalek,<sup>b</sup> Shaik M. Zakeeruddin,<sup>b,\*</sup> Qiong Zhang,<sup>a</sup> He Tian,<sup>a</sup> Michael Grätzel,<sup>b,\*</sup> and Weihong Zhu<sup>a,\*</sup>**

<sup>a</sup>Shanghai Key Laboratory of Functional Materials Chemistry, Key Laboratory for Advanced Materials and Institute of Fine Chemicals, East China University of Science and Technology, Shanghai 200237, P. R. China. Fax: (+86) 21-6425-2758. E-mail: [whzhu@ecust.edu.cn](mailto:whzhu@ecust.edu.cn)

<sup>b</sup>Laboratory for Photonics and Interfaces, Institute of Chemical Sciences and Engineering, Swiss Federal Institute of Technology, CH-1015 Lausanne, Switzerland. E-mail: [shaik.zakeer@epfl.ch](mailto:shaik.zakeer@epfl.ch), [michael.gratzel@epfl.ch](mailto:michael.gratzel@epfl.ch)

### **Contents:**

1. **Fig. S1** Cathodic cyclic voltammetry scans on **WS-2** and **WS-9** in CH<sub>2</sub>Cl<sub>2</sub>.
2. **Fig. S2** Photo-stability test of sensitizer dyes.
3. **Fig. S3-S6** Characterization of the important aldehyde precursor and final sensitizer **WS-9** by <sup>1</sup>H NMR, <sup>13</sup>C NMR and HRMS (Figures S1- S4).

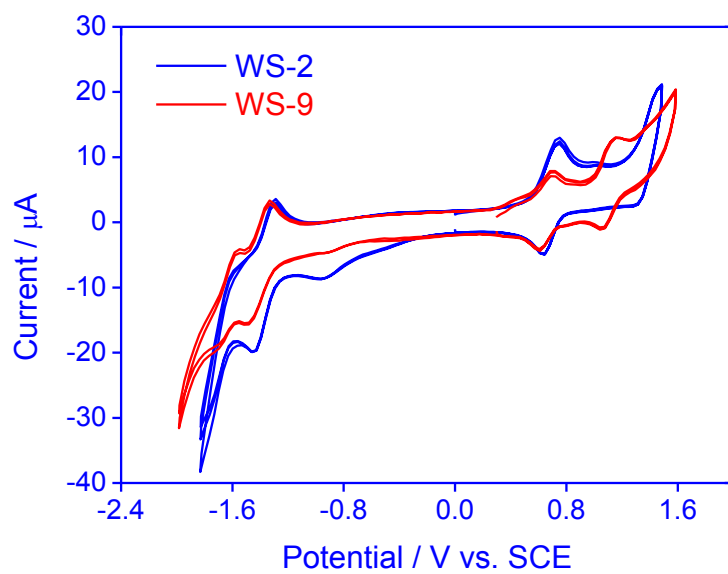

**Fig. S1** Cathodic cyclic voltammetry scans on **WS-2** and **WS-9** in  $\text{CH}_2\text{Cl}_2$ .

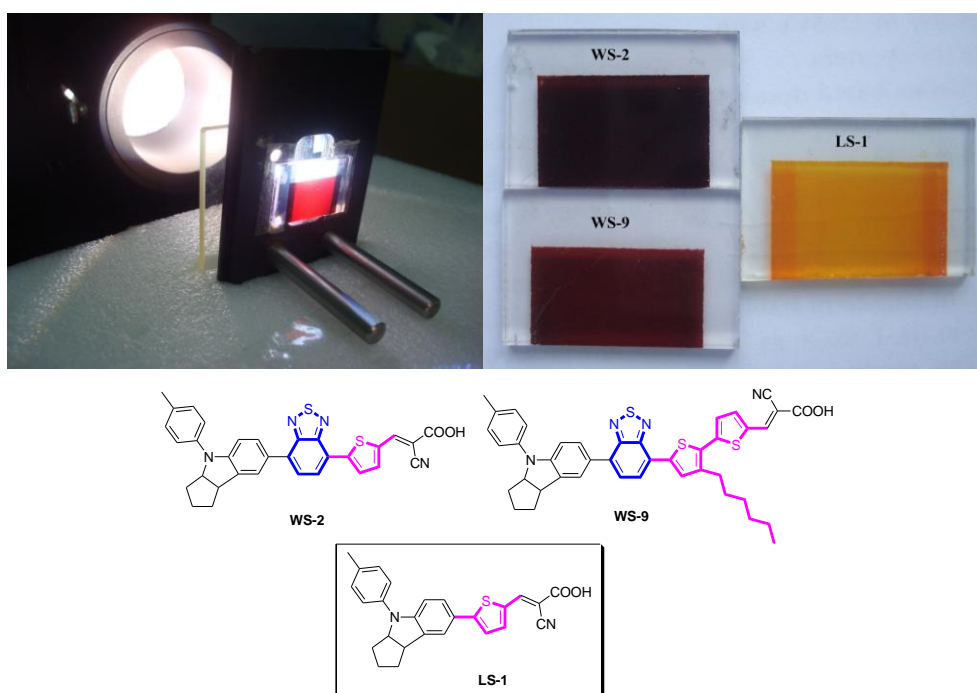

**Fig. S2** **Left:** Simulated solar light irradiation on dye (WS-9) loaded  $\text{TiO}_2$  film with an ultraviolet (UV) cut-off filter; **Right:** A photograph of the sample specimens of WS-2, WS-9 and LS-1 adsorbed on nanocrystalline  $\text{TiO}_2$  films after 30 min of simulated solar light irradiation.

In case of LS-1, the relatively darker orange-colored edges compared to the central part are due to the light blocking effect of the black holder (as shown in **Fig. S2**). Hence the edges can be considered as the film color before light irradiation. However, there is no distinct difference between the edges and centres in WS-2 and WS-9 loaded films apparently due to the negligible absorbance variation (**Fig. 12**) before and after light irradiation for 30 min. Obviously, the photo-stability of benzothiadiazole contained WS-2 and WS-9 is higher than that of dye LS-1.

Electron injection from the excited dye to the semiconductor occurs within 100 fs, suggesting that the dye degradation is not likely to occur during this short lived excited state. When the electron is injected, the dye is oxidized to its cation state until regenerated by a redox mediator (the timescale of this regeneration: 100 ns – 1 ms). For obtaining long-term stability, the sensitizers ideally must remain stable in the cation state for a long time. Generally, in a 10-year operation cycle, sensitizers are regenerated more than  $10^7$  times so that the cation state of such sensitizers must remain stable for at least 10 s (R. Katoh, A. Furube, S. Mori, M. Miyashita, K.

Sunahara, N. Koumura and K. Hara, *Energy Environ. Sci.*, 2009, **2**, 542–546). The molecular design of stable sensitizers for DSSCs must be tailored to satisfy this criterion for the dyes' cationic state. We can accelerate the dye aging process upon light irradiation on dye-loaded TiO<sub>2</sub> film without redox electrolyte. The dye regeneration process under this condition occurs in the milliseconds time range, thus taking 10<sup>4</sup> – 10<sup>3</sup> times longer than that in a complete solar cell (100 ns – 1 μs).

Dyes adsorbed on nanocrystalline TiO<sub>2</sub> films were irradiated by simulated solar light without redox mediators. Under these conditions, the lifetime of the dye cation state is limited by the recombination time between an injected electron and a parent cation, which occurs in the millisecond time range. We have monitored the change in absorbance of dye WS-2, WS-9 and LS-1 on TiO<sub>2</sub> films before and after 30 min simulated solar light irradiation. The variation of absorption spectra before and after strong light irradiation will give some information on dye photo-stability.

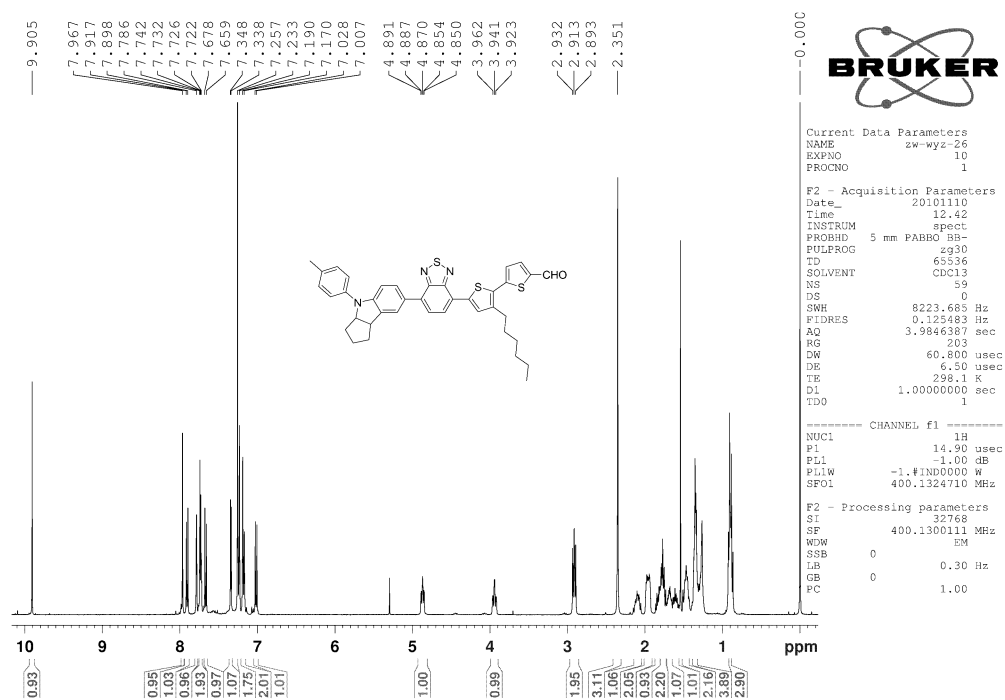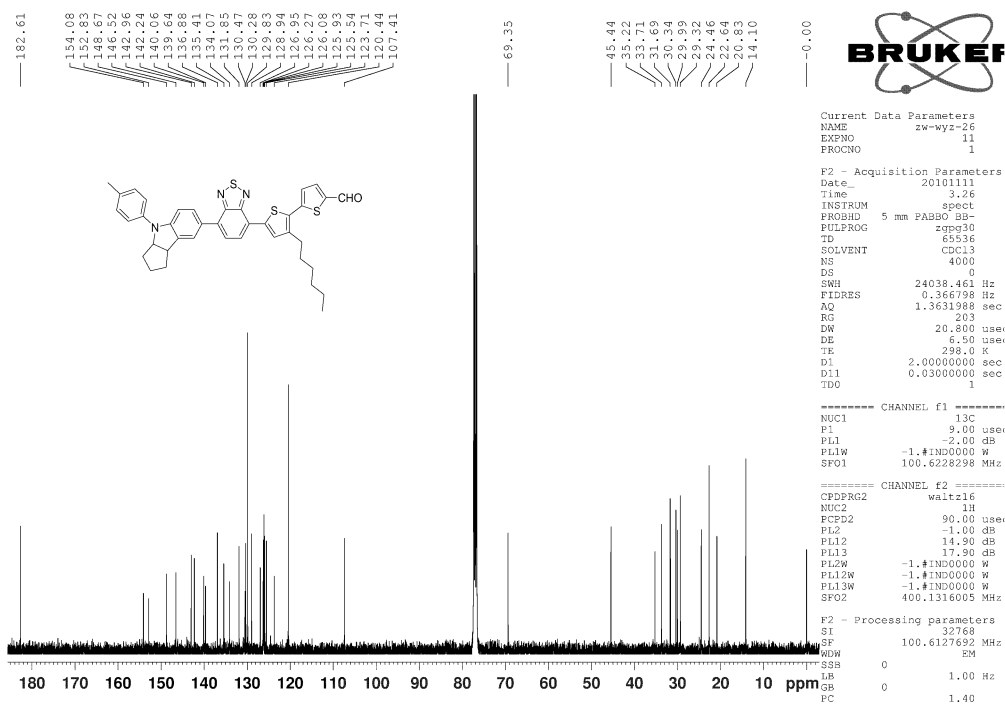

Fig. S3. <sup>1</sup>H NMR and <sup>13</sup>C NMR spectra of compound 5 recorded in CDCl<sub>3</sub>.

### Single Mass Analysis

Tolerance = 3.0 mDa / DBE: min = -1.5, max = 100.0

Element prediction: Off

Number of isotope peaks used for i-FIT = 2

Monoisotopic Mass, Even Electron Ions

57 formula(e) evaluated with 1 results within limits (up to 1 best isotopic matches for each mass)

Elements Used:

C: 0-39 H: 0-40 N: 0-5 O: 0-2 S: 0-3

ZHU-WH

ZWH-WYZ-PWS9 19 (0.667) Cm (18:24)

1: TOF MS ES+  
3.54e+004

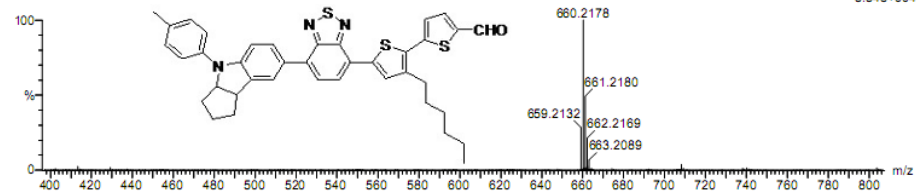

|          |            |      |     |       |       |              |                 |  |
|----------|------------|------|-----|-------|-------|--------------|-----------------|--|
| Minimum: |            |      |     | -1.5  |       |              |                 |  |
| Maximum: | 3.0        | 10.0 |     | 100.0 |       |              |                 |  |
| Mass     | Calc. Mass | mDa  | PPM | DBE   | i-FIT | i-FIT (Norm) | Formula         |  |
| 660.2178 | 660.2177   | 0.1  | 0.2 | 22.5  | 278.5 | 0.0          | C39 H38 N3 O S3 |  |

**Fig. S4.** HRMS (ESI) spectrum of compound **5**

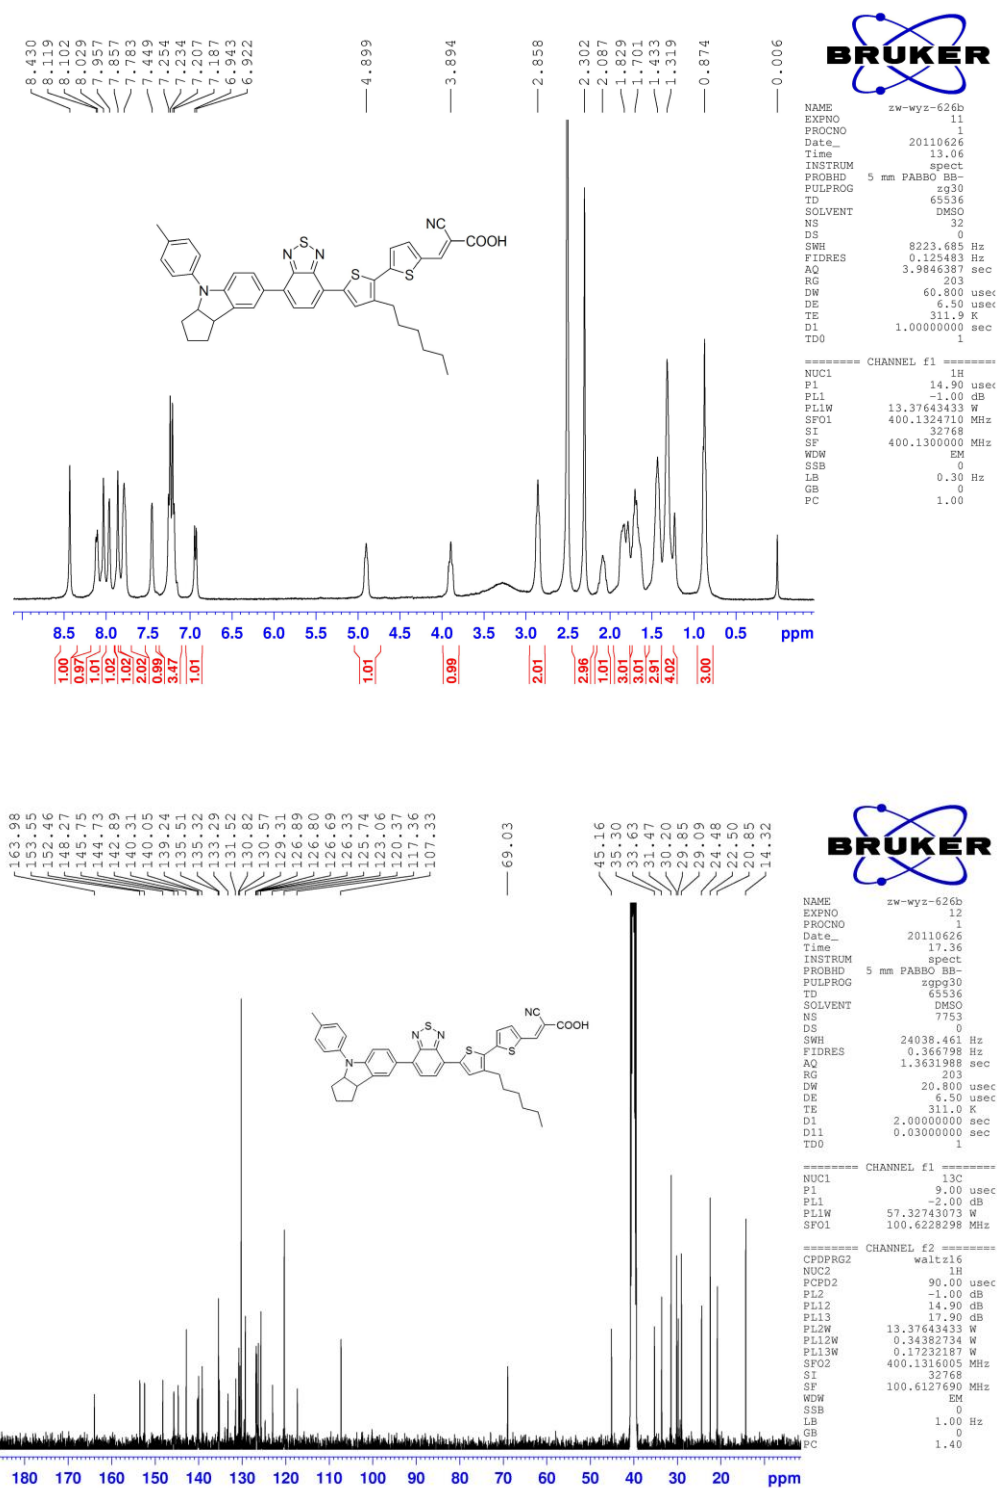

**Fig. S5.** <sup>1</sup>H NMR and <sup>13</sup>C NMR spectra of WS-9 recorded in DMSO-d<sub>6</sub>

## Elemental Composition Report

Page 1

### Single Mass Analysis

Tolerance = 3.0 mDa / DBE: min = -1.5, max = 50.0

Element prediction: Off

Number of isotope peaks used for i-FIT = 2

Monoisotopic Mass, Even Electron Ions

172 formula(e) evaluated with 1 results within limits (up to 1 best isotopic matches for each mass)

Elements Used:

C: 0-42 H: 0-40 N: 0-5 O: 0-2 S: 0-6

ZHU-WH

ZWH-WYZ-1216 23 (0.790) Cm (21:27)

1: TOF MS ES+  
8.61e+003

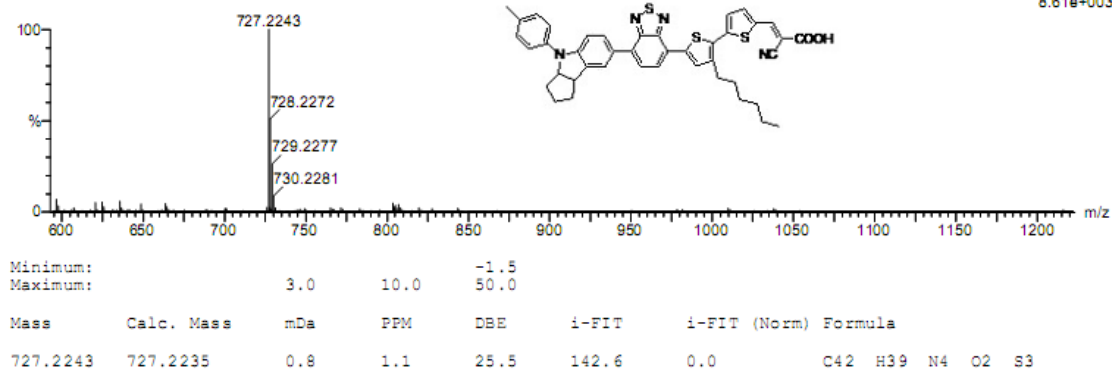

**Fig. S6.** HRMS (ESI) spectrum of **WS-9**
